# Supplementary material for: Alternative Saccharomyces interspecies hybrid combinations and their potential for low‐temperature wort fermentation
Source: PubMed Central journal article supplement (PMC5811906; doi:10.1002/yea.3246), 2017-08-30
Supplement: YEA-35-113-s001.pdf [file YEA-35-113-s001.pdf]

## Supplementary material

### **Alternative *Saccharomyces* interspecies hybrid combinations and their potential for low-temperature wort fermentation**

*Yeast*

Jarkko Nikulin<sup>1,2</sup>, Kristoffer Krogerus<sup>1,3</sup>, Brian Gibson<sup>1\*</sup>

<sup>1</sup> VTT Technical Research Centre of Finland Ltd, Tietotie 2, P.O. Box 1000, FI-02044 VTT, Espoo, Finland

<sup>2</sup> Chemical Process Engineering, Faculty of Technology, University of Oulu, P.O. Box 8000, FI-90014 Oulun Yliopisto, Finland

<sup>3</sup> Department of Biotechnology and Chemical Technology, Aalto University, School of Chemical Technology, Kemistintie 1, Aalto, P.O. Box 16100, FI-00076 Espoo, Finland

Keywords: *Saccharomyces pastorianus*, lager beer, hybridization, cold tolerance, maltotriose, aroma, phenolic off flavour

\*Corresponding author. Tel: +358 207226603, Fax: +358 207227071, Email: brian.gibson@vtt.fi

**Table S1.** Concentrations ( $\text{mg L}^{-1}$ ) of aroma compounds in the beers produced with the *de novo* hybrids and parent strains. Values are means from two independent fermentations (standard deviation in parentheses). These values were used to generate the heatmap in Figure 4 in the main text after normalization to ethanol concentration.

| Compound                 | Scer<br>A81062    | Sarb<br>C15952    | Seub<br>C12902    | Smik<br>C15949    | Suva<br>C05774    | Sc × Sa<br>JN2    | Sc × Se<br>H1     | Sc × Sm<br>JN7    | Sc × Su<br>JN4   |
|--------------------------|-------------------|-------------------|-------------------|-------------------|-------------------|-------------------|-------------------|-------------------|------------------|
| Acetaldehyde             | 26.8<br>(± 2.93)  | 7.7<br>(± 1.65)   | 21.3<br>(± 1.99)  | 1.8<br>(± 0.36)   | 3.4<br>(± 2.03)   | 44.6<br>(± 14.5)  | 10.4<br>(± 0.24)  | 17.2<br>(± 4.37)  | 7.6<br>(± 0.64)  |
| Propanol                 | 12.5<br>(± 0.31)  | 3.2<br>(± 0.05)   | 7.2<br>(± 0.62)   | 3.4<br>(± 0.05)   | 5.0<br>(± 1.87)   | 18.2<br>(± 3.58)  | 11<br>(± 0.11)    | 10.8<br>(± 0.31)  | 15.0<br>(± 1.88) |
| 2-Methylpropanol         | 7.2<br>(± 0.27)   | 2.8<br>(± 0.04)   | 12.8<br>(± 1.09)  | 2.9<br>(± 0.05)   | 4.5<br>(± 1.89)   | 9.2<br>(± 1.83)   | 11.5<br>(± 0.22)  | 8.4<br>(± 0.05)   | 12.0<br>(± 1.69) |
| 3-Methylbutanol          | 22.0<br>(± 0.43)  | 9.5<br>(± 0.19)   | 44.0<br>(± 2.96)  | 22.4<br>(± 0.16)  | 17.2<br>(± 5.79)  | 40.4<br>(± 7.36)  | 37.3<br>(± 1.35)  | 32.3<br>(± 0.8)   | 22.8<br>(± 2.73) |
| 2-Methylbutanol          | 7.2<br>(± 0.25)   | 4.0<br>(± 0.08)   | 14.5<br>(± 1.03)  | 3.9<br>(± 0.04)   | 4.7<br>(± 0.87)   | 10.7<br>(± 2.02)  | 14.0<br>(± 0.25)  | 8.8<br>(± 0.15)   | 12.8<br>(± 1.59) |
| 3-Methylbutyl<br>acetate | 0.32<br>(± 0.01)  | 0.10<br>(± 0.01)  | 0.93<br>(± 0.11)  | 0.23<br>(± 0.01)  | 0.24<br>(± 0.02)  | 1.19<br>(± 0.21)  | 0.71<br>(± 0.07)  | 0.99<br>(± 0.01)  | 0.12<br>(± 0.02) |
| Ethyl<br>acetate         | 15.4<br>(± 0.56)  | 1.9<br>(± 0.04)   | 9.3<br>(± 1.29)   | 2.2<br>(± 0.06)   | 5.1<br>(± 3.3)    | 30.9<br>(± 6.73)  | 23.9<br>(± 1.02)  | 22.7<br>(± 1.26)  | 8.5<br>(± 1.68)  |
| Ethyl<br>hexanoate       | 0.21<br>(± 0.02)  | 0.08<br>(± 0.01)  | 0.11<br>(± 0.01)  | 0.04<br>(± 0.00)  | 0.12<br>(± 0.08)  | 0.26<br>(± 0.05)  | 0.30<br>(± 0.02)  | 0.42<br>(± 0.04)  | 0.10<br>(± 0.00) |
| Ethyl<br>octanoate       | 0.12<br>(± 0.03)  | 0.35<br>(± 0.12)  | 0.02<br>(± 0.00)  | 0.12<br>(± 0.01)  | 0.08<br>(± 0.06)  | 0.06<br>(± 0.01)  | 0.09<br>(± 0.02)  | 0.14<br>(± 0.04)  | 0.01<br>(± 0.00) |
| Ethyl<br>decanoate       | 0.01<br>(± 0.001) | 0.18<br>(± 0.078) | 0.06<br>(± 0.015) | 0.03<br>(± 0.005) | 0.03<br>(± 0.008) | 0.01<br>(± 0.005) | 0.04<br>(± 0.009) | 0.01<br>(± 0.003) | ND               |
| 2-phenylethanol          | 11.0<br>(± 2.44)  | 8.1<br>(± 2.08)   | 45.6<br>(± 1.91)  | 13.2<br>(± 1.31)  | 12.9<br>(± 2.72)  | 10.2<br>(± 3.90)  | 14.1<br>(± 0.55)  | 15.0<br>(± 2.0)   | 11.4<br>(± 2.3)  |
| 2-Phenylethyl<br>acetate | ND                | ND                | 0.92<br>(± 0.06)  | 0.17<br>(± 0.01)  | 0.17<br>(± 0.02)  | 0.14<br>(± 0.01)  | 0.19<br>(± 0.05)  | 0.24<br>(± 0.04)  | ND               |

**Table S2.** Concentrations ( $\text{mg L}^{-1}$ ) of aroma compounds in the beers produced with the *de novo* hybrids of different ploidy. Values are means from two independent fermentations (standard deviation in parentheses). These values were used to generate the heatmap in Figure 6 in the main text after normalization to ethanol concentration.

| Compound              | Sc × Sm JN6         | Sc × Sm JN7         | Sc × Su JN4         | Sc × Su JN5         |
|-----------------------|---------------------|---------------------|---------------------|---------------------|
| Acetaldehyde          | 4.5 ( $\pm$ 0.40)   | 14.1 ( $\pm$ 6.21)  | 11.3 ( $\pm$ 0.27)  | 5.5 ( $\pm$ 0.16)   |
| Propanol              | 10.4 ( $\pm$ 0.20)  | 12.8 ( $\pm$ 0.34)  | 13.8 ( $\pm$ 0.18)  | 14.3 ( $\pm$ 0.31)  |
| 2-Methylpropanol      | 9.5 ( $\pm$ 0.19)   | 8.0 ( $\pm$ 0.34)   | 13.1 ( $\pm$ 0.41)  | 12.4 ( $\pm$ 0.45)  |
| 3-Methylbutanol       | 52.7 ( $\pm$ 1.65)  | 36.8 ( $\pm$ 1.92)  | 26.0 ( $\pm$ 0.98)  | 28.4 ( $\pm$ 0.98)  |
| 2-Methylbutanol       | 11.3 ( $\pm$ 0.39)  | 8.5 ( $\pm$ 0.40)   | 13.3 ( $\pm$ 0.52)  | 11.7 ( $\pm$ 0.43)  |
| 3-Methylbutyl acetate | 1.79 ( $\pm$ 0.08)  | 0.99 ( $\pm$ 0.04)  | 0.38 ( $\pm$ 0.02)  | 0.69 ( $\pm$ 0.05)  |
| Ethyl acetate         | 25.4 ( $\pm$ 0.85)  | 23.0 ( $\pm$ 0.62)  | 17.8 ( $\pm$ 0.40)  | 17.6 ( $\pm$ 0.96)  |
| Ethyl hexanoate       | 0.35 ( $\pm$ 0.01)  | 0.34 ( $\pm$ 0.01)  | 0.18 ( $\pm$ 0.01)  | 0.24 ( $\pm$ 0.01)  |
| Ethyl octanoate       | 0.27 ( $\pm$ 0.04)  | 0.29 ( $\pm$ 0.02)  | 0.04 ( $\pm$ 0.01)  | 0.11 ( $\pm$ 0.01)  |
| Ethyl decanoate       | 0.02 ( $\pm$ 0.008) | 0.02 ( $\pm$ 0.001) | 0.02 ( $\pm$ 0.004) | 0.04 ( $\pm$ 0.007) |
| 2-Phenylethanol       | 14.6 ( $\pm$ 1.06)  | 8.6 ( $\pm$ 0.79)   | 6.2 ( $\pm$ 0.68)   | 8.0 ( $\pm$ 0.76)   |
| 2-Phenylethyl acetate | 0.46 ( $\pm$ 0.04)  | 0.25 ( $\pm$ 0.02)  | 0.13 ( $\pm$ 0.07)  | 0.20 ( $\pm$ 0.01)  |

**Table S3.** Concentrations (mg L<sup>-1</sup>) of aroma compounds in the beers produced with the *de novo* *S. cerevisiae* × *S. mikatae* hybrids and their parent strains. Values are means from two independent fermentations (standard deviation in parentheses). These values were used to generate the heatmap in Figure 8 in the main text after normalization to ethanol concentration.

|                       | Scer A81062    | Scer A94132   | Smik C15949    | Sc × Sm JN7    | Sc × Sm JN10   | Sc × Sm JN11   |
|-----------------------|----------------|---------------|----------------|----------------|----------------|----------------|
| Acetaldehyde          | 11.1 (± 0.82)  | 4.3 (± 0.65)  | 0.7 (± 0.09)   | 5.8 (± 0.42)   | 2.5 (± 0.15)   | 1.3 (± 0.16)   |
| Propanol              | 13.3 (± 0.52)  | 11.2 (± 1.01) | 3.9 (± 0.15)   | 11.9 (± 0.44)  | 11.0 (± 0.19)  | 12.6 (± 0.69)  |
| 2-Methylpropanol      | 5.7 (± 0.04)   | 5.0 (± 0.35)  | 3.2 (± 0.04)   | 7.0 (± 0.33)   | 8.6 (± 0.24)   | 7.5 (± 0.08)   |
| 3-Methylbutanol       | 22.4 (± 0.33)  | 27.9 (± 1.97) | 24.5 (± 0.82)  | 36.8 (± 1.88)  | 35.5 (± 0.87)  | 43.2 (± 0.3)   |
| 2-Methylbutanol       | 5.9 (± 0.05)   | 5.4 (± 0.34)  | 3.7 (± 0.14)   | 7.5 (± 0.42)   | 8.8 (± 0.29)   | 8.5 (± 0.18)   |
| 3-Methylbutyl acetate | 0.36 (± 0.03)  | 0.26 (± 0.02) | 0.31 (± 0.01)  | 1.11 (± 0.1)   | 0.96 (± 0.06)  | 1.25 (± 0.13)  |
| Ethyl acetate         | 13.5 (± 0.82)  | 7.6 (± 0.66)  | 2.4 (± 0.08)   | 20.0 (± 1.95)  | 14.7 (± 0.66)  | 14.8 (± 1.93)  |
| Ethyl hexanoate       | 0.27 (± 0.02)  | 0.23 (± 0.03) | 0.07 (± 0.00)  | 0.37 (± 0.02)  | 0.27 (± 0.01)  | 0.37 (± 0.01)  |
| Ethyl octanoate       | 0.26 (± 0.04)  | 0.45 (± 0.08) | 0.30 (± 0.06)  | 0.30 (± 0.05)  | 0.43 (± 0.02)  | 0.73 (± 0.04)  |
| Ethyl decanoate       | 0.04 (± 0.008) | 0.1 (± 0.028) | 0.03 (± 0.011) | 0.03 (± 0.005) | 0.06 (± 0.002) | 0.08 (± 0.016) |
| 2-Phenylethanol       | 3.8 (± 0.38)   | 2.6 (± 0.11)  | 8.5 (± 0.24)   | 7.4 (± 0.27)   | 5.1 (± 0.37)   | 7.7 (± 0.37)   |
| 2-Phenylethyl acetate | ND             | ND            | 0.15 (± 0.01)  | 0.17 (± 0.02)  | 0.10 (± 0.01)  | 0.17 (± 0.02)  |

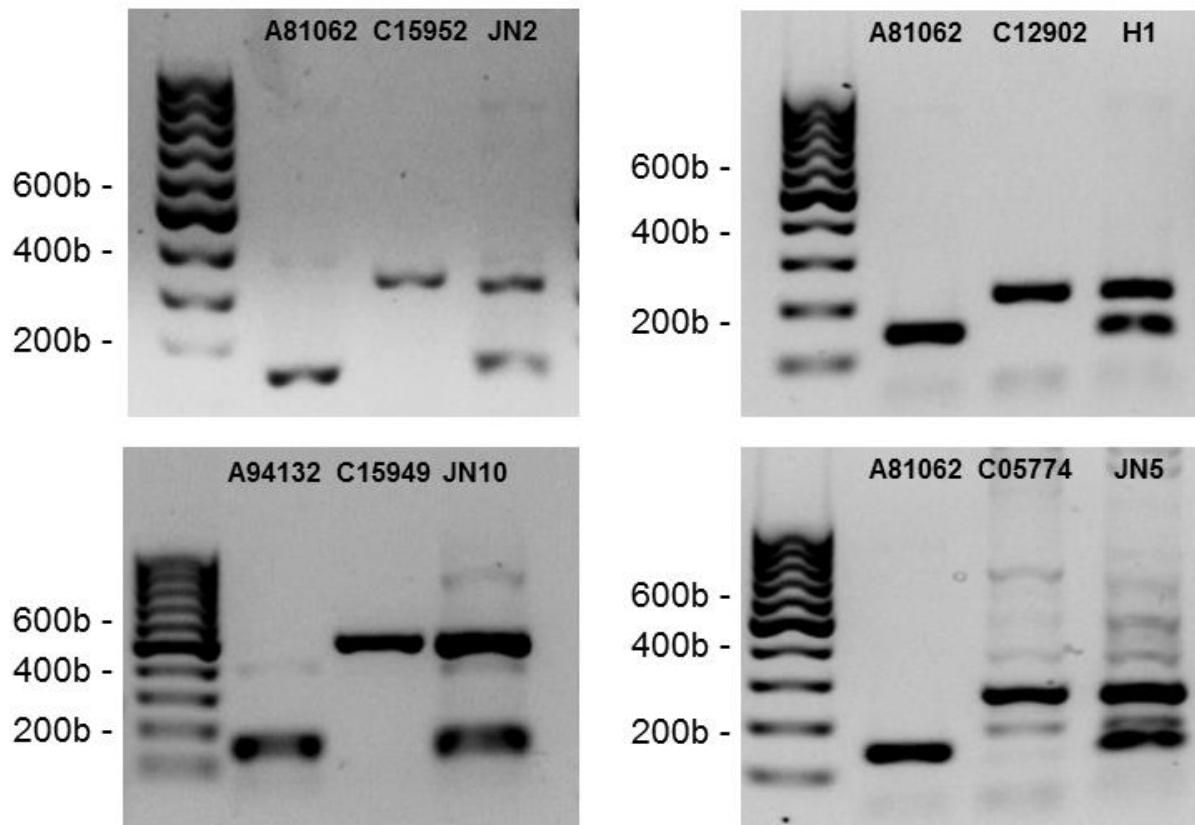

**Figure S1.** Hybrid confirmation by species-specific PCR. Strains included are the parental strains *S. cerevisiae* A81062 and A94132, *S. arboricola* C15952, *S. eubayanus* C12902, *S. mikatae* C15949 and *S. uvarum* C05774 along with the interspecies hybrids JN2 (A81062 x C15952), H1 (A81062 x C12902), JN10 (A94132 x C15949) and JN5 (A81062 x C05774). Genes amplified are *MEX67/YPL169C* (*S. cerevisiae*), *SEC24/YIL109C* (*S. arboricola*), *FSY1* (*S. eubayanus*) and *DBP6/YNR038W* (*S. uvarum*). All hybrids with the same parental combinations showed identical banding patterns.

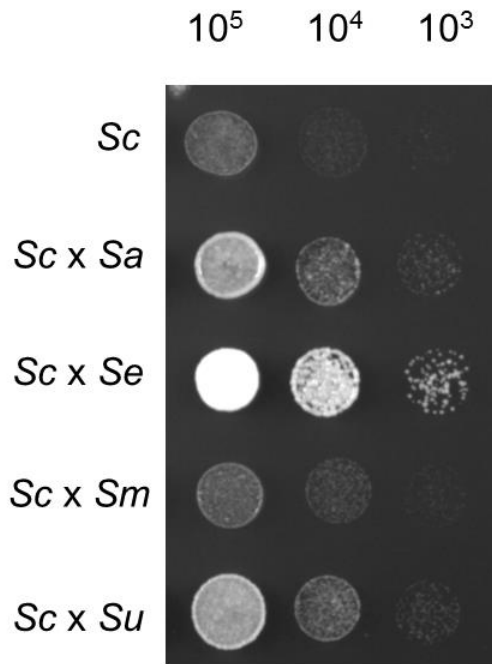

**Figure S2.** Growth of the parental strain *S. cerevisiae* A81062 (Sc), hybrid JN2 (*S. cerevisiae* A81062 x *S. arboricola* C15952), hybrid H1 (A81062 x *S. eubayanus* C12902), hybrid JN7 (A81062 x *S. mikatae* C15949), and hybrid JN4 (A81062 x *S. uvarum* C05774). YPD agar cultures were incubated 21 days at 4°C.
